# Supplementary material
Source: Springer Nature journal article supplement (https://www.springermedizin.de/resource/supplementary/12967_2014_1869_MOESM1_ESM.pdf/9574962)
Supplement: MOESM1 [file 9574962]

**Table 1. Functionalized carbon nanotubes and graphene on Lymphocytes**

| Material                                                                            | Funzionalizations                                                                                   | Species                                                                             | Model                              | Lymphocyte type and other cells               | Year | Reference                                  |
|-------------------------------------------------------------------------------------|-----------------------------------------------------------------------------------------------------|-------------------------------------------------------------------------------------|------------------------------------|-----------------------------------------------|------|--------------------------------------------|
|    | Oxidized and conjugate with FITC and amphotericin B                                                 |    | In vitro (Jurkat)                  | L. T                                          | 2005 | Wu W et al. (Angew. Chem.)                 |
|    | Oxidized                                                                                            |    | Ex vivo, in vitro (Jurkat)         | L. T                                          | 2006 | Bottini M et al. (Toxicology Letters)      |
|    | 1,3-dipolar cycloaddition and oxidation/amidation                                                   |    | Ex vivo                            | L. B and T, Macrophages and Polynuclear cells | 2006 | Dumortier H et al. (Nano Letters)          |
|  | Streptavidin-conjugated Quantum Dots                                                                |  | In vitro (Jurkat)                  | L.T                                           | 2006 | Bottini M et al. (Biomacromolecules)       |
|  | PL-PEG and conjugated with RNAi of CXCR4 and CD4 receptors                                          |  | Ex vivo, in vitro (MAGI)           | L. T, PBMCs                                   | 2007 | Liu Z et al. (Angew. Chem)                 |
|  | PEGylated and fluorochrome-coupled neutravidin, and subsequently with anti-CD3epsilon and anti-CD28 |  | In vivo, in vitro (Jurkat)         | L. T                                          | 2008 | Cato MH et al. (J Nanosci Nanotechnol.)    |
|  | Acid treated and conjugate with antibody (anti-CD3)                                                 |  | In vitro [Hybridoma T cells (B3Z)] | L. T                                          | 2008 | Fadel TR et al. (Nano Letters)             |
|  | Nylon-6                                                                                             |  | Ex vivo                            | PBMCs                                         | 2009 | Ochoa-Olmos et al. (J Nanosci Nanotechnol) |

|                                                                                     |                                                                               |                                                                                     |                   |                   |      |                                                            |
|-------------------------------------------------------------------------------------|-------------------------------------------------------------------------------|-------------------------------------------------------------------------------------|-------------------|-------------------|------|------------------------------------------------------------|
|    | PEGylated conjugated with anti-PTPN22 20-mer antisense oligonucleotides       |    | In vitro (Jurkat) | L. T              | 2009 | Delogu LG et al. (Bioconjugate Chem.)                      |
|    | Carboxylated and conjugated with tuberculin purified protein derivative (PDD) |    | Ex vivo, in vivo  | L. T, Macrophages | 2009 | Zeinali M et al. (Immunology Letters)                      |
|    | Amidated                                                                      |    | Ex vivo           | PBMCs             | 2010 | Cveticanin J et al. (Nanotechnology)                       |
|    | Treated with Tween 80                                                         |    | In vitro (A3 L.)  | L. T              | 2010 | Hu X et al. (Science of the Total Environment)             |
|  | Acid treated and conjugate with antibody (CD3 and CD28)                       |  | Ex vivo           | L. T              | 2010 | Fadel TR et al. (Langmuir)                                 |
|  | Oxidized                                                                      |  | In vitro (Jurkat) | L. T              | 2010 | Sabuncu AC et al. (Colloids and Surfaces B: Biointerfaces) |
|  | PEGylated/TEGylated and conjugate with Amphotericin B                         |  | In vitro (Jurkat) | L. T              | 2010 | Benincasa M et al. (ACS Nano)                              |
|  | Acid treated                                                                  |  | In vivo           | L. T, Macrophages | 2010 | Kim JE et al. (J Toxicol Environ Health )                  |
|  | PEGylated                                                                     |  | In vitro (Jurkat) | L. T              | 2010 | Delogu LG et al. (J Nanosci Nanotechnol)                   |

|                                                                                     |                                             |                                                                                     |                                             |                    |      |                                         |
|-------------------------------------------------------------------------------------|---------------------------------------------|-------------------------------------------------------------------------------------|---------------------------------------------|--------------------|------|-----------------------------------------|
|    | Oxidized                                    |    | Ex vivo                                     | PBMCs              | 2011 | Sun Z et al. (Plos One)                 |
|    | Oxidized, amidated and conjugated with FITC |    | Ex vivo                                     | PBMCs              | 2012 | Delogu LG et al. (Nanomedicine (Lond).) |
|    | Carboxylated                                |    | Ex vivo, in vivo                            | L. T, DCs          | 2011 | Tkach AV et al. (ACS Nano)              |
|    | Primary amines conjugate with WT1Pep427     |    | Ex vivo                                     | L. T, DCs          | 2011 | Villa CH (ACS Nano)                     |
|  | None                                        |  | In vivo, ex vivo                            | L. T               | 2012 | Ni G et al. (Immunology letters)        |
|  | None                                        |  | Ex vivo, in vitro (RAW 264.7)               | PBMCs, Macrophages | 2012 | Sasidharan A et al. (Small)             |
|  | Negatively charged                          |  | Ex vivo, in vitro [Hybridoma T cells (B3Z)] | L. T, DCs          | 2012 | Tkach AV et al. (Small)                 |
|  | Carboxylated and conjugate with MHC-I/SIIN  |  | Ex vivo                                     | L. T               | 2013 | Fadel TR (Small)                        |
|  | Oxidized and 1,3-dipolar cycloaddition      |  | In vitro (Jurkat, THP1)                     | L. T, Monocytes    | 2013 | Pescatori M et al. (Biomaterials)       |

|                                                                                   |                                                  |                                                                                   |                |                                   |      |                                        |
|-----------------------------------------------------------------------------------|--------------------------------------------------|-----------------------------------------------------------------------------------|----------------|-----------------------------------|------|----------------------------------------|
|  | Coated with<br><i>polyvinylpyrrolidone (PVP)</i> |  | <i>Ex vivo</i> | <i>L. T, DCs,<br/>Macrophages</i> | 2013 | <i>Zhi X et al.<br/>(Biomaterials)</i> |
|-----------------------------------------------------------------------------------|--------------------------------------------------|-----------------------------------------------------------------------------------|----------------|-----------------------------------|------|----------------------------------------|

| Legend                                                                              |                                                                     |
|-------------------------------------------------------------------------------------|---------------------------------------------------------------------|
|    | MWCNTs                                                              |
|    | DWCNTs                                                              |
|    | SWCNTs                                                              |
|    | Carbon Nanohorns                                                    |
|    | Graphene                                                            |
|   | Graphene Oxide                                                      |
|  | Mouse                                                               |
|  | Human                                                               |
| <i>Italics</i>                                                                      | <i>Articles that considered<br/>more than one type of<br/>cells</i> |
